# Supplementary material
Source: MDPI journal article supplement (https://www.mdpi.com/2071-1050/9/1/34)
Supplement: s1 [file s1]

# Supplementary Materials: A Meta-Analysis of Human–Wildlife Conflict: South African and Global Perspectives

Nimmi Seoraj-Pillai and Neville Pillay

**Table S1.** Description of categories that gauge vulnerability of human-wildlife-conflict species and severity of conflict. A description of how species were categorised for vulnerability and conflict status is provided using guidelines proposed by Gittleman et al. (2001) and Inskip and Zimmermann (2009). These categories identified levels of biodiversity extinction vulnerability with corresponding abbreviations for such classification.

| Category                                       | Description                                                                        | Category                      | Description                                                                                                                       |
|------------------------------------------------|------------------------------------------------------------------------------------|-------------------------------|-----------------------------------------------------------------------------------------------------------------------------------|
| Index of Vulnerability                         |                                                                                    | Conflict Status               |                                                                                                                                   |
| Poorly researched, data deficient (PR)         | Animal appears only once in the published literature database                      | Low-scale conflict (LSC)      | Wild animal rarely attacks people, seldom depredates livestock or crops, rarely experiences retaliatory killing                   |
| Moderately persecuted (MP)                     | Animal appears two to four times in the database and may be moderately persecuted  | Moderate-scale conflict (MSC) | Wild animal rarely attacks people, or may frequently depredate livestock or crops, or experiences frequent retaliatory killings   |
| Severely persecuted (SP)                       | Animal appears more than four times in the database and may be severely persecuted | High-scale conflict (HSC)     | Wild animal frequently attacks people and/or recurrently depredates livestock or crops, experiences frequent retaliatory killings |
| Research required (RR) or Future research (FR) | No research has been conducted on this species in published literature             | Status unknown (SU)           | Anecdotal evidence of conflict is available. No scientific evidence in literature                                                 |

**Table S2.** Problem animals that affected commercial farmers, local communities, subsistence farmers and pooled-farmers (subsistence and commercial farmers). Numbers denote the number of cases that appeared in the published literature database.

| Commercial Farmers     | Local Communities          | Subsistence Farmers | Subsistence and Commercial Farmers |
|------------------------|----------------------------|---------------------|------------------------------------|
| Antelopes              |                            |                     |                                    |
|                        | Kudu (1)                   | Eland (1)           | Musk deer (1)                      |
|                        | Nilgai (1)                 | Kudu (1)            |                                    |
|                        | Ungulates non-specific (1) | Nilgai (1)          |                                    |
|                        |                            | Roan antelope (1)   |                                    |
|                        |                            | Sitatunga (1)       |                                    |
| Birds                  |                            |                     |                                    |
| Birds non-specific (8) | Birds (4)                  | Raptor (1)          | Birds non-specific (1)             |
| Flamingo (1 case)      | Raptor (1)                 |                     |                                    |
|                        | Vulture (1)                |                     |                                    |

Table S2. Cont.

| Commercial Farmers                      | Local Communities                  | Subsistence Farmers       | Subsistence and Commercial Farmers |
|-----------------------------------------|------------------------------------|---------------------------|------------------------------------|
| <b>Carnivores</b>                       |                                    |                           |                                    |
| African lion (6)                        | African lion (7)                   | African civet (2)         | African lion (4)                   |
| African wild dog (6)                    | African wild dog (6)               | African lion (4)          | African wild dog (2)               |
| American black bear (1)                 | Amur tiger (1)                     | African wild cat (1)      | American black bear (2)            |
| Brown bear (4)                          | Asiatic black bear (2)             | Cheetah (1)               | Brown bear (1)                     |
| Caracal (4)                             | Asiatic jackal (2)                 | Eurasian lynx (1)         | Carnivora non-specific (1)         |
| Carnivora non-specific (1)              | Brown bear (2)                     | Genet (1)                 | Hyaena (1)                         |
| Cheetah (8)                             | Carnivora non-specific (5)         | Hyaena (2)                | Jaguar (2)                         |
| Coyote (1)                              | Cheetah (1)                        | Jackal (1)                | Leopard (1)                        |
| Eurasian lynx (3)                       | Eurasian lynx (1)                  | Leopard (5)               | Puma (1)                           |
| Hyaena (11)                             | Florida black bear (1)             | Serval (1)                | Snow leopard (3)                   |
| Iberian lynx (1)                        | Himalayan black bear (2)           | Snow leopard (1)          | Tiger (2)                          |
| Jackal (7)                              | Hyaena (3)                         | Tiger (2)                 | Wolf (1)                           |
| Jaguar (2)                              | Jackal (2)                         | Wolf (1)                  |                                    |
| Leopard (9)                             | Jaguar (1)                         |                           |                                    |
| Puma (5)                                | Leopard (10)                       |                           |                                    |
| Serval (2)                              | Red fox (1)                        |                           |                                    |
| Snow leopard (1)                        | Serval (1)                         |                           |                                    |
| Wolf (11)                               | Snow leopard (5)                   |                           |                                    |
| Wolverine (3)                           | Sun bear (1)                       |                           |                                    |
|                                         | Tiger (13)                         |                           |                                    |
|                                         | Wolf (5)                           |                           |                                    |
| <b>Mega-herbivores</b>                  |                                    |                           |                                    |
| Buffalo (1)                             | Asian elephant (1)                 | Asian elephant (2)        | Elephant (3)                       |
| Commercial farmers                      | Local communities                  | Subsistence farmers       | Subsistence and commercial farmers |
| Bushpig (2)                             | One-horned Rhinoceros (1)          | Buffalo (2)               |                                    |
| Elephant (9)                            | Rhinoceros (1)                     | Elephant (8)              |                                    |
| Porcupine (1)                           |                                    |                           |                                    |
| Wild boar (1)                           |                                    |                           |                                    |
| <b>Other mammals/Omnivorous feeders</b> |                                    |                           |                                    |
| Commercial farmers                      | Local communities                  | Subsistence farmers       | Subsistence and commercial farmers |
| Feral house mouse (2)                   | Bushpig (2)                        | Bushpig (1)               | Dhole (1)                          |
|                                         | Dhole (3)                          | Feral domestic pig (1)    | Porcupine (1)                      |
|                                         | European bison (1)                 | Honey badger (1)          | Wild boar (1)                      |
|                                         | European rabbit (1)                | Mongoose (1)              |                                    |
|                                         | Porcupine (1)                      | Porcupine (2)             |                                    |
|                                         | Rodents (3)                        | Squirrel (1)              |                                    |
|                                         | Warthog (2)                        | Sulawesi warty pig (1)    |                                    |
|                                         | Wild boar (4)                      | Warthog (1)               |                                    |
|                                         |                                    | Wild boar (2)             |                                    |
| <b>Primates</b>                         |                                    |                           |                                    |
| Baboon (2)                              | Baboon (9)                         | Agile mangabey (1)        | Baboon (1)                         |
| Chimpanzee (1)                          | Black and white colobus monkey (1) | Baboon (4)                | Chimpanzee (1)                     |
| Long-tailed macaque (1)                 | Black howler monkey (1)            | Blue monkey (1)           | Primates non-specific (1)          |
| Orangutan (2)                           | Blue monkey (2)                    | Buton macaque (1)         | Sclater's monkey (1)               |
| Red colobus monkey (1)                  | Chimpanzee (1)                     | Chimpanzee (2)            | Vervet monkey (1)                  |
| Red-tailed monkey (2)                   | Other Primates (2)                 | Kipunji forest monkey (1) |                                    |
| Thomas' leaf monkey (1)                 | Patas monkey (1)                   | Red-tailed monkey (1)     |                                    |
| Vervet monkey (1)                       | Red-tailed monkey (2)              | Rhesus macaque (2)        |                                    |
|                                         | Vervet monkey (3)                  | White-collared monkey (1) |                                    |

**Table S3.** Vulnerability index and conflict status of problem animals that appeared in the human-wildlife conflict literature database. The common name, species name (where available), the International Union for Conservation of Nature status for each animal (as at 2015) and the number of publications in which each animal featured is included. Bold text indicates endangered species that do not appear in the published literature database and hence, their vulnerability index requires assessment and their conflict status is unknown.

| Common Name of Problem Animal | Species                         | IUCN Status           | Number of Publications | Vulnerability Index |    |    |       | Conflict Status |
|-------------------------------|---------------------------------|-----------------------|------------------------|---------------------|----|----|-------|-----------------|
|                               |                                 |                       |                        | PR                  | MP | SP | RR/FR |                 |
| Antelope                      |                                 |                       |                        |                     |    |    |       |                 |
| Eland                         | <i>Tragelaphus oryx</i>         | Least concern         | 1                      | X                   |    |    |       | Low-scale       |
| Hirola                        | <i>Damaliscus lunatus</i>       | Critically endangered | 0                      |                     |    |    | X     | Status unknown  |
| Kudu                          | <i>Tragelaphus strepsiceros</i> | Least concern         | 2                      |                     | X  |    |       | Moderate-scale  |
| Musk deer                     | <i>Moschus leucogaster</i>      | Endangered            | 1                      | X                   |    |    |       | Low-scale       |
| Nilgai                        | <i>Boselaphus tragocamelus</i>  | Least concern         | 2                      |                     | X  |    |       | Moderate-scale  |
| Roan                          | <i>Hippotragus equinus</i>      | Least concern         | 1                      | X                   |    |    |       | Low-scale       |
| Sitatunga                     | <i>Tragelaphus spekii</i>       | Least concern         | 1                      | X                   |    |    |       | Low-scale       |
| Birds                         |                                 |                       |                        |                     |    |    |       |                 |
| Blackbird                     | <i>Turdus merula</i>            | Least concern         | 1                      | X                   |    |    |       | Low-scale       |
| Crane                         | Gruidae                         |                       | 2                      |                     | X  |    |       | Moderate-scale  |
| Crow                          | Corvus                          |                       | 1                      | X                   |    |    |       | Low-scale       |
| Dove                          | Columbidae                      |                       | 2                      |                     | X  |    |       | Moderate-scale  |
| Flamingo                      | <i>Phoenicopterus roseus</i>    | Least concern         | 1                      | X                   |    |    |       | Low-scale       |
| Goose                         | Anserinae                       |                       | 2                      |                     | X  |    |       | Moderate-scale  |
| Golden eagle                  | <i>Aquila chrysaetos</i>        | Least concern         | 1                      | X                   |    |    |       | Low-scale       |
| Green parrot                  | Trichoglossus                   |                       | 1                      | X                   |    |    |       | Low-scale       |
| Partridge                     | Perdicinae                      |                       | 1                      | X                   |    |    |       | Low-scale       |
| Pigeon                        | Columbidae                      |                       | 2                      |                     | X  |    |       | Moderate-scale  |
| Raptor                        | Unspecified                     |                       | 2                      |                     | X  |    |       | Moderate-scale  |
| Thrush                        | Turdidae                        |                       | 2                      |                     | X  |    |       | Moderate-scale  |
| Vulture                       | Unspecified                     |                       | 1                      | X                   |    |    |       | Low-scale       |
| Weaverbird                    | Ploceidae                       | Least concern         | 1                      | X                   |    |    |       | Low-scale       |

Table S3. Cont.

| Common Name of Problem Animal | Species                            | IUCN Status           | Number of Publications | Vulnerability Index |    |    |       | Conflict Status |
|-------------------------------|------------------------------------|-----------------------|------------------------|---------------------|----|----|-------|-----------------|
|                               |                                    |                       |                        | PR                  | MP | SP | RR/FR |                 |
| Carnivores                    |                                    |                       |                        |                     |    |    |       |                 |
| African lion                  | <i>Panthera leo</i>                | Vulnerable            | 21                     |                     |    | X  |       | High-scale      |
| African wild cat              | <i>Felis silvestris</i>            | Least concern         | 1                      | X                   |    |    |       | Low-scale       |
| African wild dog              | <i>Lycaon pictus</i>               | Endangered            | 14                     |                     |    | X  |       | High-scale      |
| American black bear           | <i>Ursus americanus</i>            | Least concern         | 3                      |                     | X  |    |       | Moderate-scale  |
| Amur tiger                    | <i>Panthera tigris altaica</i>     | Endangered            | 1                      | X                   |    |    |       | Low-scale       |
| Amur leopard                  | <i>Panthera pardus orientalis</i>  | Critically endangered | 0                      |                     |    |    | X     | Status unknown  |
| Asiatic black bear            | <i>Ursus thibetanus</i>            | Vulnerable            | 2                      |                     | X  |    |       | Moderate-scale  |
| Asiatic jackal                | <i>Canis aureus</i>                | Least concern         | 2                      |                     | X  |    |       | Moderate-scale  |
| Asiatic wild dog/dhole        | <i>Cuon alpinus</i>                | Endangered            | 4                      |                     | X  |    |       | Moderate-scale  |
| Black-backed jackal           | <i>Canis mesomelas</i>             | Least concern         | 8                      |                     |    | X  |       | High-scale      |
| Brown bear                    | <i>Ursus arctos</i>                | Least concern         | 7                      |                     |    | X  |       | High-scale      |
| Brown hyena                   | <i>Hyaena brunnea</i>              | Near threatened       | 5                      |                     |    | X  |       | High-scale      |
| Caracal                       | <i>Caracal caracal</i>             | Least concern         | 4                      |                     | X  |    |       | Moderate-scale  |
| Cheetah                       | <i>Acinonyx jubatus</i>            | Vulnerable            | 10                     |                     |    | X  |       | High-scale      |
| Common jackal                 | <i>Canis aureus aureus</i>         | Least concern         | 2                      |                     | X  |    |       | Moderate-scale  |
| Ethiopian wolf                | <i>Canis simensis</i>              | Endangered            | 1                      | X                   |    |    |       | Low-scale       |
| Eurasian lynx                 | <i>Lynx lynx</i>                   | Least concern         | 5                      |                     |    | X  |       | High-scale      |
| Florida black bear            | <i>Ursus americanus floridanus</i> | Least concern         | 1                      | X                   |    |    |       | Low-scale       |
| Gray wolf                     | <i>Canis lupus</i>                 | Least concern         | 18                     |                     |    | X  |       | High-scale      |
| Grizzly bear                  | <i>Ursus arctos</i>                | Least concern         | 2                      |                     | X  |    |       | Moderate-scale  |
| Himalayan black bear          | <i>Ursus thibetanus</i>            | Vulnerable            | 2                      |                     | X  |    |       | Moderate-scale  |
| Iberian lynx                  | <i>Lynx pardinus</i>               | Endangered            | 1                      | X                   |    |    |       | Low-scale       |
| Jaguar                        | <i>Panthera onca</i>               | Near threatened       | 5                      |                     |    | X  |       | High-scale      |
| Leopard                       | <i>Panthera pardus</i>             | Vulnerable            | 25                     |                     |    | X  |       | High-scale      |
| Other Carnivora               |                                    |                       | 5                      |                     |    | X  |       | High-scale      |
| Puma                          | <i>Puma concolor</i>               | Least concern         | 6                      |                     |    | X  |       | High-scale      |
| Red fox                       | <i>Vulpes vulpes</i>               | Least concern         | 1                      | X                   |    |    |       | Low-scale       |
| Scandinavian wolverine        | <i>Gulo gulo</i>                   | Least concern         | 3                      |                     | X  |    |       | Moderate-scale  |
| Serval                        | <i>Leptailurus serval</i>          | Least concern         | 4                      |                     | X  |    |       | Moderate-scale  |
| Snow leopard                  | <i>Panthera uncia</i>              | Endangered            | 10                     |                     |    | X  |       | High-scale      |
| Spotted hyena                 | <i>Crocota crocuta</i>             | Least concern         | 12                     |                     |    | X  |       | High-scale      |
| Sun bear                      | <i>Helarctos malayanus</i>         | Vulnerable            | 1                      | X                   |    |    |       | Low-scale       |
| Tiger                         | <i>Panthera tigris</i>             | Endangered            | 17                     |                     |    | X  |       | High-scale      |

Table S3. Cont.

| Common Name of Problem Animal | Species                       | IUCN Status     | Number of Publications | Vulnerability Index |    |    |       | Conflict Status |
|-------------------------------|-------------------------------|-----------------|------------------------|---------------------|----|----|-------|-----------------|
|                               |                               |                 |                        | PR                  | MP | SP | RR/FR |                 |
| Mega-herbivores               |                               |                 |                        |                     |    |    |       |                 |
| African elephant              | <i>Loxodonta africana</i>     | Vulnerable      | 31                     |                     |    | X  |       | High-scale      |
| Asian elephant                | <i>Elephas maximus</i>        | Endangered      | 3                      |                     | X  |    |       | Moderate-scale  |
| Cape buffalo                  | <i>Syncerus caffer</i>        | Least concern   | 3                      |                     | X  |    |       | Moderate-scale  |
| Great Indian one-horned rhino | <i>Rhinoceros unicornis</i>   | Vulnerable      | 1                      | X                   |    |    |       | Low-scale       |
| Hippopotamus                  | <i>Hippopotamus amphibius</i> | Vulnerable      | 1                      | X                   |    |    |       | Low-scale       |
| Other mammals                 |                               |                 |                        |                     |    |    |       |                 |
| Aardvark                      | <i>Orycteropus afer</i>       | Least concern   | 1                      | X                   |    |    |       | Low-scale       |
| African civet                 | <i>Civettictis civetta</i>    | Least concern   | 2                      |                     | X  |    |       | Moderate-scale  |
| Bushpig                       | <i>Potamochoerus larvatus</i> | Least concern   | 5                      |                     |    | X  |       | High-scale      |
| Common genet                  | <i>Genetta genetta</i>        | Least concern   | 1                      | X                   |    |    |       | Low-scale       |
| European Bison                | <i>Bison bonasus</i>          | Vulnerable      | 1                      | X                   |    |    |       | Low-scale       |
| European rabbit               | <i>Oryctolagus cuniculus</i>  | Near threatened | 1                      | X                   |    |    |       | Low-scale       |
| Feral Domestic pig            | <i>Sus domesticus</i>         | Least concern   | 1                      | X                   |    |    |       | Low-scale       |
| Feral house mouse             | <i>Mus musculus</i>           | Least concern   | 2                      |                     | X  |    |       | Moderate-scale  |
| Honey badger                  | <i>Mellivora</i> spp.         | Least concern   | 3                      |                     | X  |    |       | Moderate-scale  |
| Mongoose                      | <i>Herpestes</i> sp.          |                 | 1                      | X                   |    |    |       | Low-scale       |
| Rodents                       | Rodentia                      | Least concern   | 3                      |                     | X  |    |       | Moderate-scale  |
| Porcupine                     | Hystricidae                   | Least concern   | 5                      |                     |    | X  |       | High-scale      |
| Rice field rat                | <i>Rattus argentiventer</i>   | Least concern   | 2                      |                     | X  |    |       | Moderate-scale  |
| Squirrel                      | Sciuridae                     | Least concern   | 1                      | X                   |    |    |       | Low-scale       |
| Sulawesi warty pig            | <i>Sus celebensis</i>         | Near threatened | 1                      | X                   |    |    |       | Low-scale       |
| Warthog                       | <i>Phacochoerus</i> spp.      |                 | 4                      |                     | X  |    |       | Moderate-scale  |
| Wild boar                     | <i>Sus scrofa</i>             | Least concern   | 8                      |                     |    | X  |       | High-scale      |

Table S3. Cont.

| Common Name of Problem Animal           | Species                                                | IUCN Status           | Number of Publications | Vulnerability Index |    |    |       | Conflict Status |
|-----------------------------------------|--------------------------------------------------------|-----------------------|------------------------|---------------------|----|----|-------|-----------------|
|                                         |                                                        |                       |                        | PR                  | MP | SP | RR/FR |                 |
| Primates                                |                                                        |                       |                        |                     |    |    |       |                 |
| Agile mangabey                          | <i>Cercocebus agilis</i>                               | Least concern         | 1                      | X                   |    |    |       | Low-scale       |
| Black and white colobus monkey          | <i>Colobus</i> sp.                                     | Endangered            | 1                      | X                   |    |    |       | Low-scale       |
| Black howler monkey                     | <i>Alouatta caraya</i>                                 | Least concern         | 1                      | X                   |    |    |       | Low-scale       |
| Blue monkey                             | <i>Cercopithecus mitis</i>                             | Least concern         | 2                      |                     | X  |    |       | Moderate-scale  |
| Boutourlini's blue monkey               | <i>Cercopithecus mitis</i> spp.<br><i>boutourlinii</i> | Vulnerable            | 1                      | X                   |    |    |       | Low-scale       |
| Buton macaque                           | <i>Macaca</i> sp.                                      | Vulnerable            | 1                      | X                   |    |    |       | Low-scale       |
| Chacma baboon                           | <i>Papio ursinus</i>                                   | Least concern         | 2                      |                     | X  |    |       | Moderate-scale  |
| Chimpanzee                              | <i>Pan troglodytes</i>                                 | Endangered            | 5                      |                     |    | X  |       | High-scale      |
| Grey-cheeked mangelbey                  | <i>Lophocebus albigena</i>                             | Least concern         | 1                      | X                   |    |    |       | Low-scale       |
| Kipunji forest monkey                   | <i>Rungwecebus kipunji</i>                             | Critically endangered | 1                      | X                   |    |    |       | Low-scale       |
| Long-tailed macaque                     | <i>Macaca fascicularis</i>                             | Least concern         | 1                      | X                   |    |    |       | Low-scale       |
| Moloney's white-collared monkey         | <i>Cercopithecus mitis</i> spp.<br><i>moloneyi</i>     | Least concern         | 1                      | X                   |    |    |       | Low-scale       |
| Moustached guenon                       | <i>Cercopithecus cephus</i>                            | Least concern         | 1                      | X                   |    |    |       | Low-scale       |
| Northern muriqui (woolly spider monkey) | <i>Brachyteles hypoxanthus</i>                         | Critically endangered | 0                      |                     |    |    | X     | Status unknown  |
| Olive baboon                            | <i>Papio anubis</i>                                    | Least concern         | 11                     |                     |    | X  |       | High-scale      |
| Orangutan                               | <i>Pongo</i> spp.                                      | Critically endangered | 6                      |                     |    | X  |       | High-scale      |
| Patas monkey                            | <i>Erythrocebus patas</i>                              | Least concern         | 1                      | X                   |    |    |       | Low-scale       |
| Pig-tailed macaque                      | <i>Macaca leonina</i>                                  | Vulnerable            | 1                      | X                   |    |    |       | Low-scale       |
| Red colobus monkey                      | <i>Procolobus</i> sp.                                  |                       | 1                      | X                   |    |    |       | Low-scale       |
| Red-tailed monkey                       | <i>Cercopithecus ascanius</i>                          | Least concern         | 6                      |                     |    | X  |       | High-scale      |
| Rhesus macaque                          | <i>Macaca mulatta</i>                                  | Least concern         | 2                      |                     | X  |    |       | Moderate-scale  |
| Sclater's monkey                        | <i>Cercopithecus sclateri</i>                          | Vulnerable            | 1                      | X                   |    |    |       | Low-scale       |
| Thomas' leaf monkey                     | <i>Presbytis thomasi</i>                               | Vulnerable            | 1                      | X                   |    |    |       | Low-scale       |
| Vervet monkey                           | <i>Chlorocebus pygerythrus</i>                         | Least concern         | 5                      |                     |    | X  |       | High-scale      |
| Yellow baboon                           | <i>Papio cynocephalus</i>                              | Least concern         | 3                      |                     | X  |    |       | Moderate-scale  |

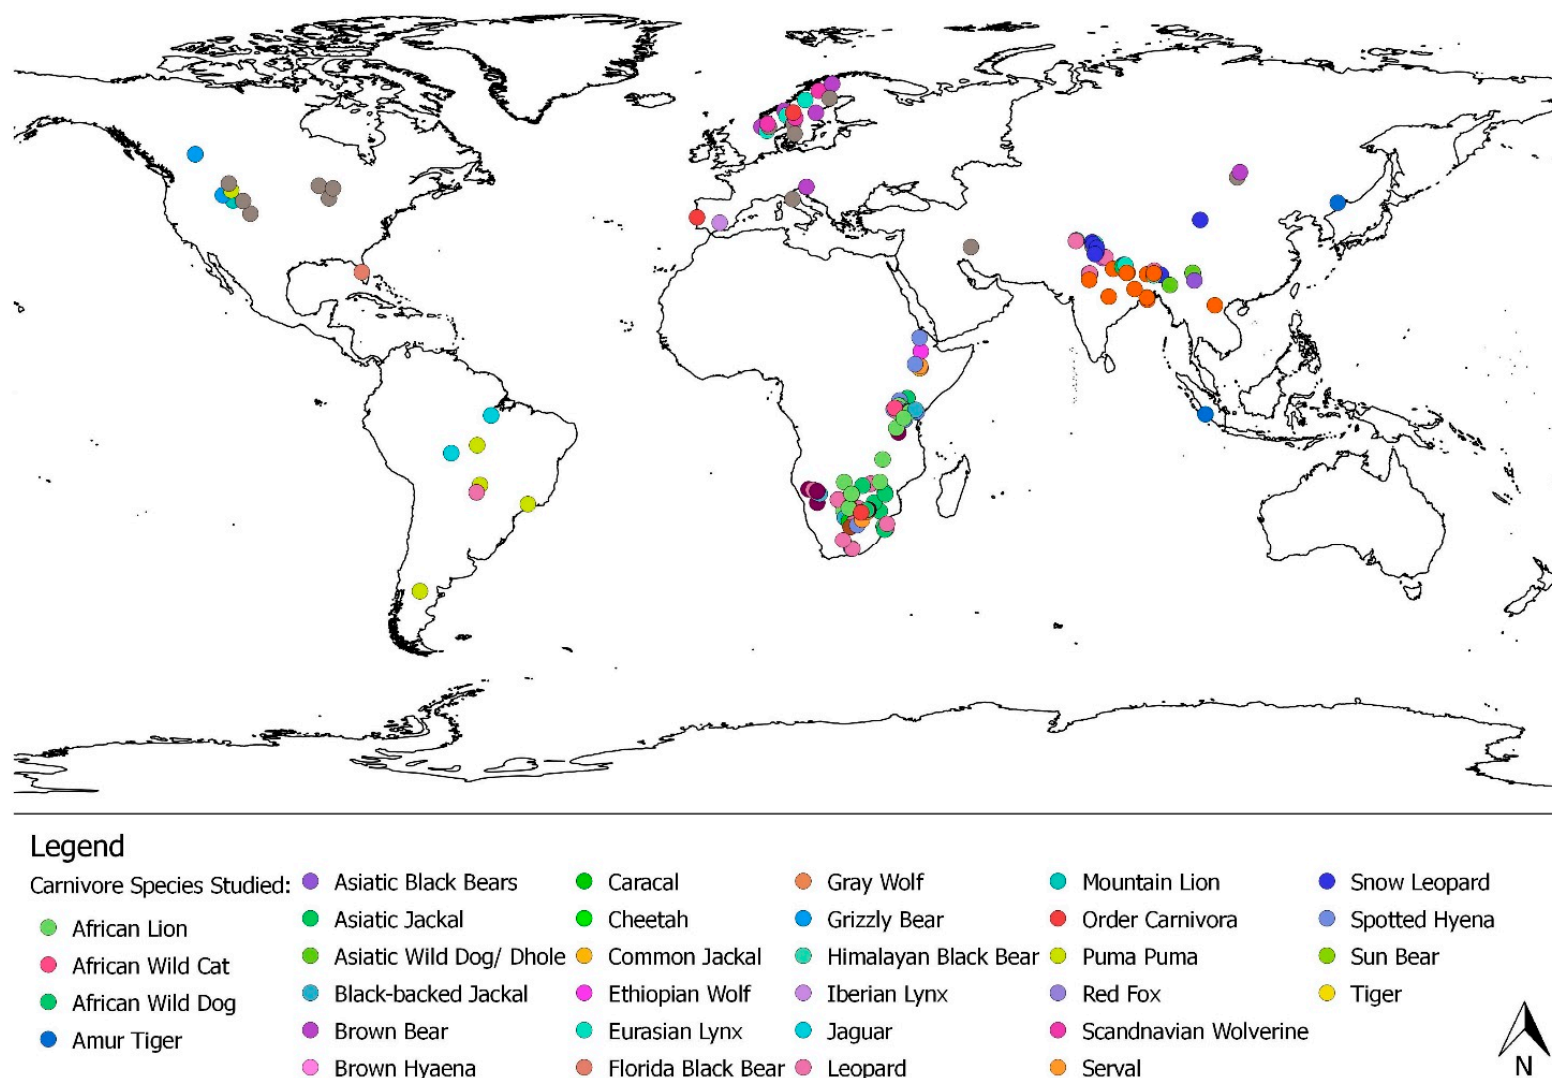

**Figure S1.** A species-level occurrence of published human-carnivore-conflict from 1994–2015. Coloured circles are global positioning system data points that show human-carnivore-conflict study sites by carnivore species.

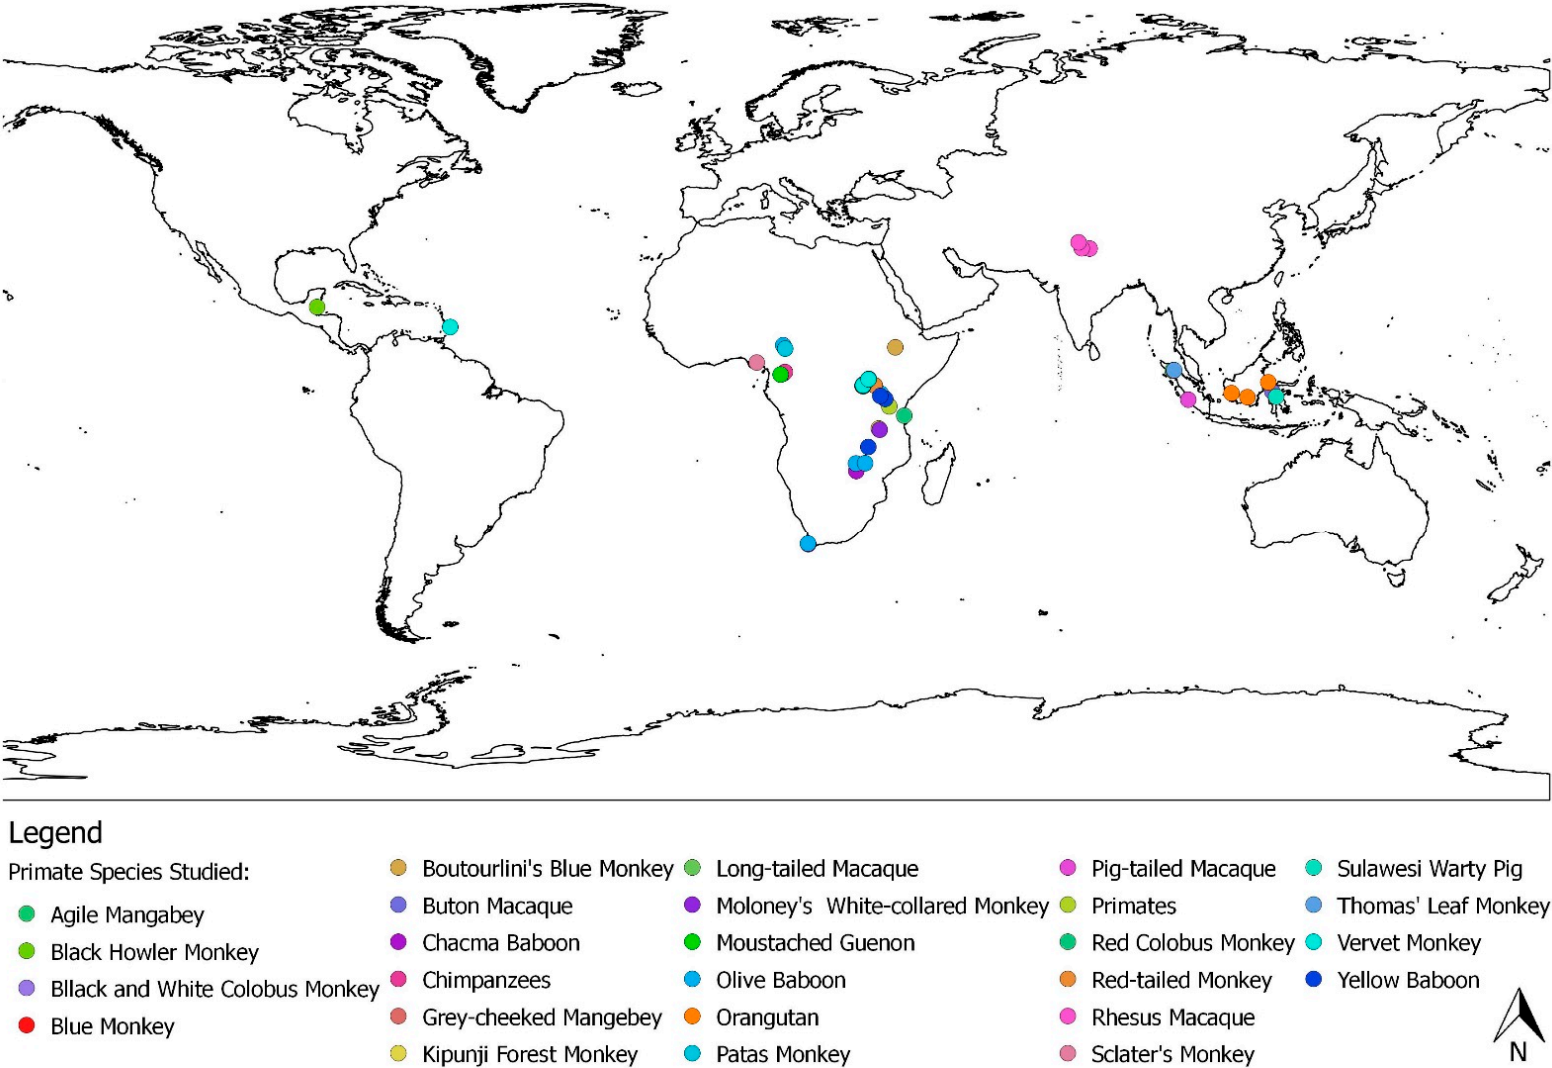

**Figure S2.** A species-level occurrence of published human-primate conflict from 1994–2015. Coloured circles are global positioning system data points that show human-primate-conflict study sites by primate species.



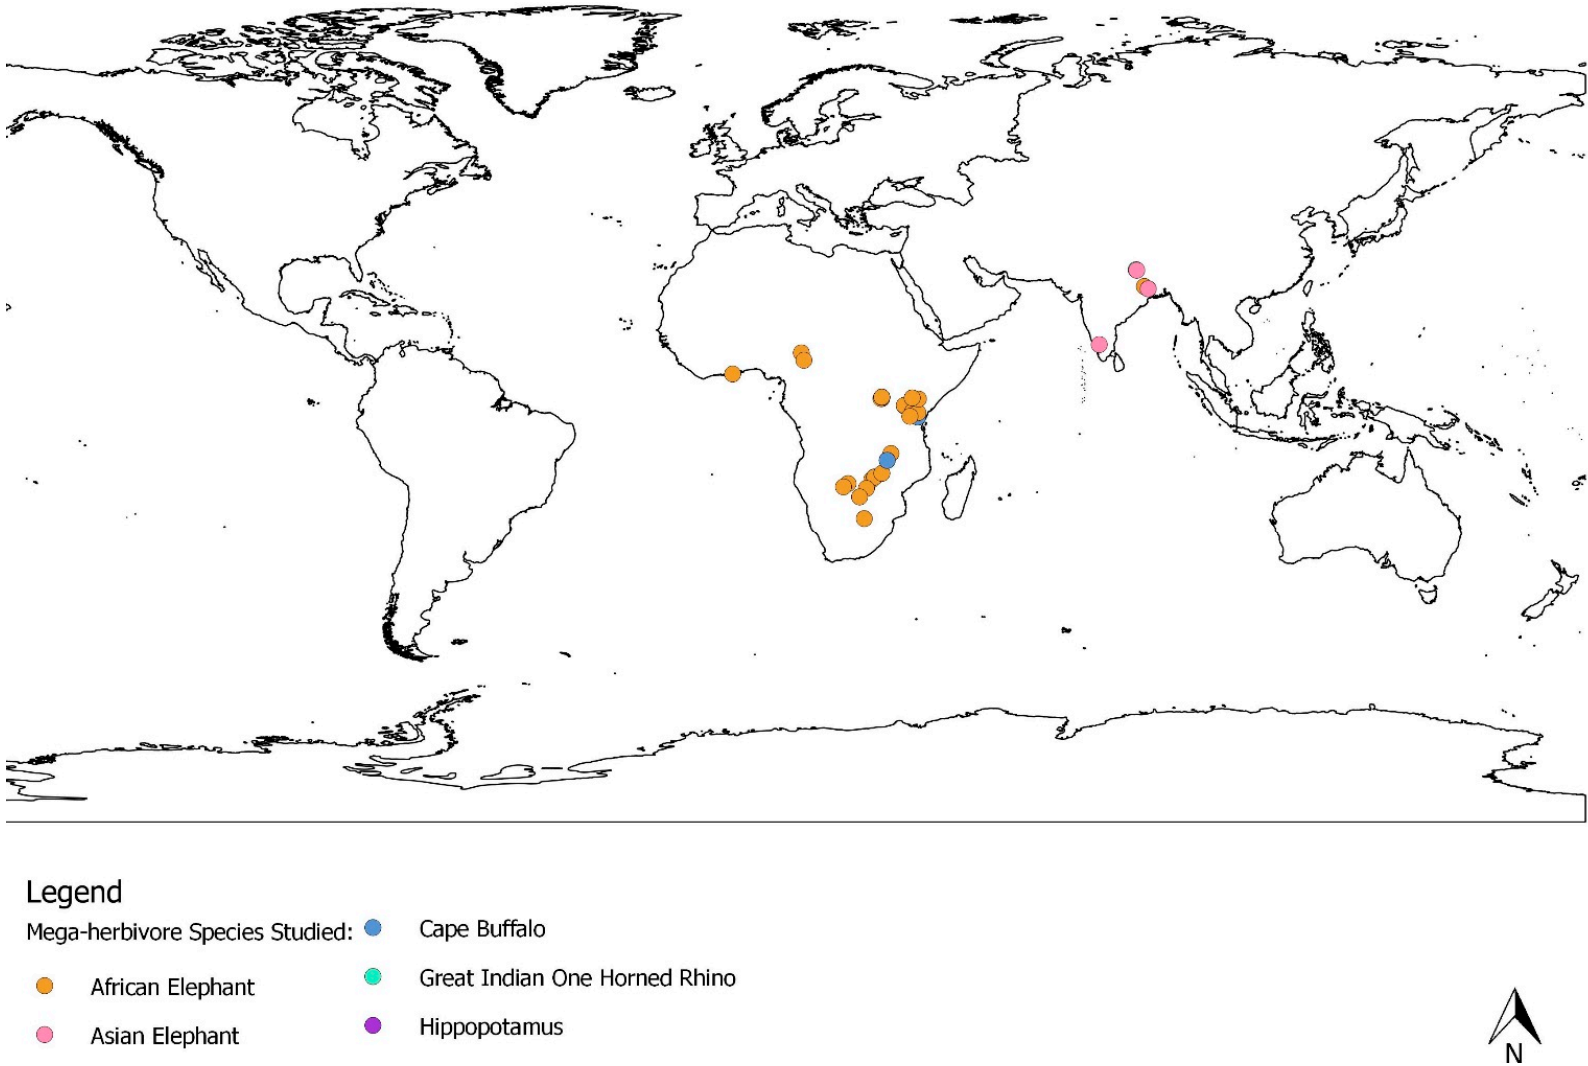

**Figure S3.** A species-level occurrence of published human-mega-herbivore conflict from 1994–2015. Coloured circles are global positioning system data points that show human-mega-herbivore-conflict study sites.

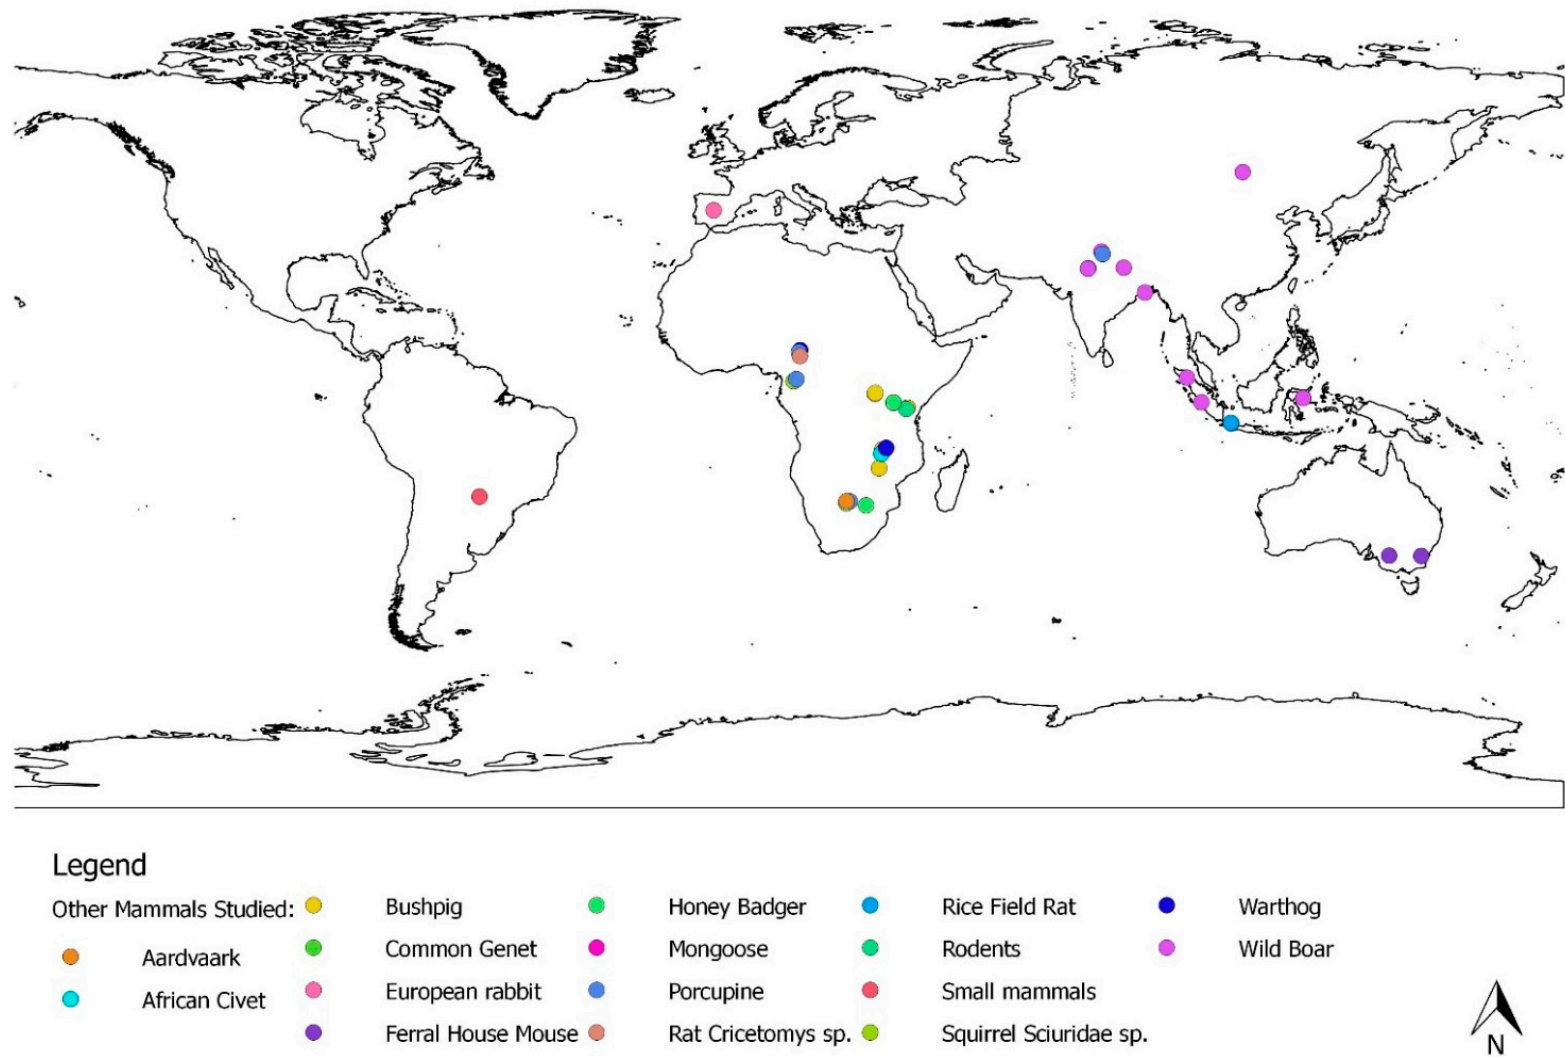

**Figure S4.** A species-level occurrence of published human and other mammal conflict from 1994–2015. Coloured circles are global positioning system data points that show human-other-mammal-conflict study sites by species.

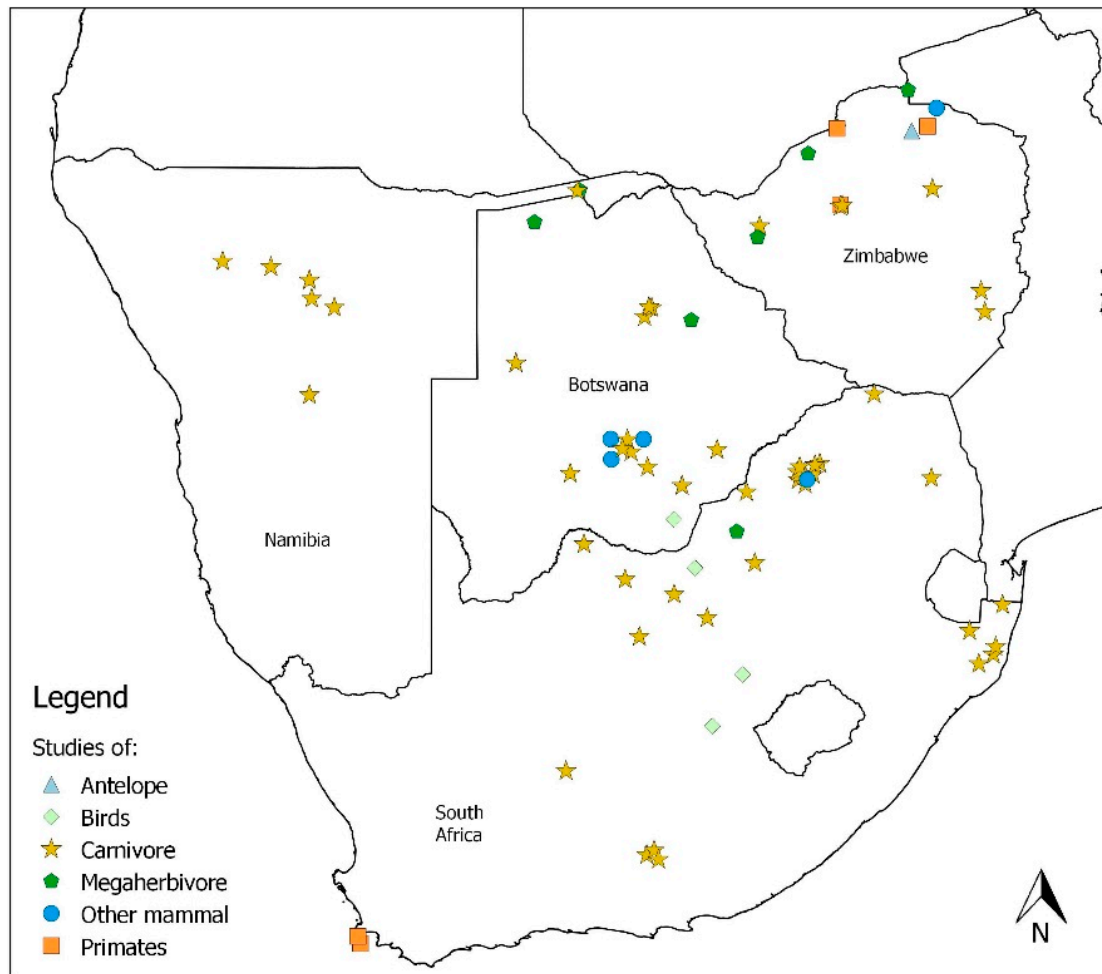

**Figure S5.** The distribution of publications concerning human-wildlife conflict in Sub-Saharan Africa from 1994 to 2015. Coloured circles are global positioning system data points for wildlife involved in human-wildlife conflict.
